1 **Sequencing of the MHC region defines *HLA-DQA1* as the major**  
2 **independent risk for anti-citrullinated protein antibodies**  
3 **(ACPA)-positive rheumatoid arthritis in Han population**

4 Jianping Guo<sup>1,2##</sup>, Tao Zhang<sup>3,4#</sup>, Hongzhi Cao<sup>3,5,6#</sup>, Xiaowei Li<sup>3,4#</sup>, Hao Liang<sup>7#</sup>,  
5 Mengru Liu<sup>1</sup>, Yundong Zou<sup>1</sup>, Yuanwei Zhang<sup>3,4</sup>, Xiaolin Sun<sup>1,2</sup>, Fanlei Hu<sup>1,2</sup>, Yan  
6 Du<sup>1</sup>, Xiaodong Mo<sup>3,4</sup>, Xu Liu<sup>1</sup>, Yue Yang<sup>1</sup>, Huanjie Yang<sup>3,4</sup>, Xinyu Wu<sup>1</sup>, Xuewu  
7 Zhang<sup>1</sup>, Huijue Jia<sup>3,4</sup>, Hui Jiang<sup>3,4</sup>, Yong Hou<sup>3,4</sup>, Xin Liu<sup>3,4</sup>, Yin Su<sup>1,2</sup>, Mingrong  
8 Zhang<sup>3,4</sup>, Huanming Yang<sup>3,8</sup>, Jian Wang<sup>3,8</sup>, Liangdan Sun<sup>9</sup>, Liang Liu<sup>10</sup>, Leonid  
9 Padyukov<sup>11</sup>, Luhua Lai<sup>7</sup>, Kazuhiko Yamamoto<sup>12</sup>, Xuejun Zhang<sup>9,13\*</sup>, Lars  
10 Klareskog<sup>11\*</sup>, Xun Xu<sup>3,4\*</sup> and Zhanguo Li<sup>1,2,14,15\*</sup>

11 <sup>1</sup> Department of Rheumatology and Immunology, Peking University People's Hospital,  
12 Beijing 100044, China

13 <sup>2</sup> Beijing Key Laboratory for Rheumatism Mechanism and Immune Diagnosis  
14 (BZ0135), Beijing 100044, China

15 <sup>3</sup> BGI-Shenzhen, Shenzhen 518083, China

16 <sup>4</sup> China National GeneBank-Shenzhen, BGI-Shenzhen, Shenzhen 518083, China

17 <sup>5</sup> Shenzhen Digital Life Institute, Shenzhen 518083, China

18 <sup>6</sup> iCarbonX, Shenzhen 518083, China

19 <sup>7</sup> BNLMs, State Key Laboratory for Structural Chemistry of Unstable and Stable  
20 Species, Peking-Tsinghua Center for Life Sciences at College of Chemistry and

21 Molecular Engineering, and Center for Quantitative Biology, Peking University,  
22 Beijing 100871, China.

23 <sup>8</sup> James D. Watson Institute of Genome Sciences, Hangzhou, 310008, China

24 <sup>9</sup> Institute of Dermatology and Department of Dermatology, the First Affiliated  
25 Hospital, Anhui Medical University, Hefei 230032, China

26 <sup>10</sup> State Key Laboratory of Quality Research in Chinese Medicine, Macau Institute  
27 For Applied Research in Medicine and Health, Macau University of Science and  
28 Technology, Macau, SAR, China

29 <sup>11</sup> Department of Medicine, Rheumatology Unit, Karolinska Institutet, Stockholm,  
30 Sweden

31 <sup>12</sup> Laboratory for Autoimmune Diseases, RIKEN Center for Integrative Medical  
32 Sciences, Yokohama, Japan

33 <sup>13</sup> Institute of Dermatology and Department of Dermatology, Huashan Hospital,  
34 Fudan University, Shanghai, China.

35 <sup>14</sup> Peking-Tsinghua Center for Life Sciences, Beijing 100871, China

36 <sup>15</sup> State Key Laboratory of Natural and Biomimetic Drugs, School of Pharmaceutical  
37 Sciences, Peking University, Beijing, China

38 # These authors contributed equally to this work

39 \* Correspondence should be addressed to Jianping Guo ([jianping.guo@bjmu.edu.cn](mailto:jianping.guo@bjmu.edu.cn)),  
40 Xuejun Zhang ([ayzxj@vip.sina.com](mailto:ayzxj@vip.sina.com)), Lars Klareskog ([Lars.Klareskog@ki.se](mailto:Lars.Klareskog@ki.se)), Xun  
41 Xu ([xunxu@genomics.cn](mailto:xunxu@genomics.cn)) or Zhanguo Li ([li99@bjmu.edu.cn](mailto:li99@bjmu.edu.cn)).

42

43 **ABSTRACT**

44 The strong genetic contribution of the major histocompatibility complex (MHC) to  
45 rheumatoid arthritis (RA) susceptibility has been generally attributed to *HLA-DRB1*.  
46 However, due to the high linkage disequilibrium in the MHC region, it is difficult to  
47 define the ‘real’ or/and additional independent genetic risks using the conventional  
48 HLA genotyping or chip-based microarray technology. By the capture sequencing of  
49 entire MHC region for discovery and HLA-typing for validation in 2,773 subjects of  
50 Han ancestry, we identified HLA-DQ $\alpha$ 1:160D as the strongest independent genetic  
51 risk for anti-citrullinated protein antibodies (ACPA)-positive RA in Han population  
52 ( $P = 6.16 \times 10^{-36}$ , OR=2.29). Further stepwise conditional analysis revealed that  
53 DR $\beta$ 1:37N has an independent protective effect on ACPA-positive RA ( $P = 5.81 \times$   
54  $10^{-16}$ , OR=0.49). The DQ $\alpha$ 1:160 coding allele *DQAI\*0303* displayed high impact on  
55 joint radiographic severity, especially in patients with early disease and smoking ( $P =$   
56  $3.02 \times 10^{-5}$ ). Interaction analysis by comparative molecular modeling revealed that  
57 the negative charge of DQ $\alpha$ 1:160D stabilizes the dimer of dimers, leading to an  
58 increased T cell activation. The electrostatic potential surface analysis indicated that  
59 the negative charged DR $\beta$ 1:37N encoding alleles could bind with epitope P9 arginine,  
60 thus may result in a decreased RA susceptibility.

61 In this study, we provide the first evidence that *HLA-DQAI*, instead of *HLA-DRB1*, is  
62 the strongest and independent genetic risk for ACPA-positive RA in Chinese Han

63 population. Our study also illustrates the value of MHC deep sequencing for fine  
64 mapping disease risk variants in the MHC region.

65 **INTRODUCTION**

66 Rheumatoid Arthritis (RA) is a chronic and systemic autoimmune syndrome primarily  
67 affecting peripheral joints. Results from several studies indicate that RA is a  
68 heterogeneous disease where different subsets of the disease results from complex  
69 interactions between different genetic and environmental factors<sup>1-3</sup>. The genetic  
70 factors are believed to influence not only disease susceptibility but also severity. The  
71 major histocompatibility complex (MHC) genes, encoding the human leukocyte  
72 antigens (HLA), represent the best described genetic risk loci linking to RA  
73 susceptibility in all populations that have been investigated so far. HLA-DR genetic  
74 variants are mainly associated with anti-citrullinated protein antibodies  
75 (ACPA)-positive RA<sup>4-10</sup>. Furthermore, studies have reported that the RA-risk HLA  
76 alleles are heterogeneous among ethnic groups. For example, *HLA-DRB1\*04:01* is the  
77 major RA-risk alleles in European Caucasians, whereas *DRB1\*04:05* is the most  
78 frequent RA-risk alleles in East Asians<sup>8,11-14</sup>. In addition to *HLA-DRB1*, other HLA  
79 genes, such as *HLA-B* and *-DPB1*, have also been suggested to play a role in  
80 susceptibility to RA<sup>9,15</sup>. However, due to the high linkage disequilibrium (LD) in  
81 MHC region, extended haplotype structures, and high density genes within MHC  
82 region, it is difficult to identify the ‘real’ or/and additional independent genetic risks  
83 by the conventional HLA genotyping and chip-based microarray technology, which  
84 defines MHC-resident association(s) based on indirect haplotype determination<sup>16,17</sup>.

85 Smoking has been recognized as the most prominent environmental factor for RA  
86 development and severity<sup>18,19</sup>. One important aspect of smoking as RA-risk factor is  
87 its involvement in gene-environment interaction. Smoking has greater impact on RA  
88 in individuals being carriers of *HLA-DRB1* alleles, and the interaction between  
89 smoking and *HLA-DRB1* alleles mainly confers a higher risk for ACPA-positive  
90 RA<sup>6,20-26</sup>.

91 To fine map HLA region and identify novel variants contributing to RA, we  
92 performed a deep sequencing for entire MHC region. We analyzed HLA alleles,  
93 amino acids, SNPs, and indels across the MHC region to define the association for  
94 ACPA-positive RA. To the best of our knowledge, we showed for the first time that  
95 DQ $\alpha$ 1:160D, instead of *DRB1*\*0405, is the greatest and independent risk factor for  
96 ACPA-positive RA in Han population. Conditional analysis further revealed that  
97 DR $\beta$ 1:37N is an independent protective factor for ACPA-positive RA. We validated  
98 and confirmed these novel findings in an independent case-control cohort by classical  
99 HLA genotyping methodology. Moreover, we observed that one of DQ $\alpha$ 1:160D  
100 encoding alleles *DQA1*\*0303 confers strong risk for joint destruction in patients with  
101 early disease and smoking.

102

103

## 104 MATERIAL AND METHODS

### 105 Study subjects

106 Two independent cohorts, including 1358 subjects for discovery cohort (357 cases  
107 and 1001 controls) and 1415 subjects for validation cohort (604 cases and 811  
108 controls), were enrolled in the study. Patients satisfied the American College of  
109 Rheumatology 1987 revised criteria for a diagnosis of RA<sup>27</sup>, and were recruited from  
110 the Department of Rheumatology and Immunology at Peking University People's  
111 Hospital. All cases were ACPA-positive RA patients. ACPA were quantified using a  
112 second generation anti-CCP (anti-cyclic citrullinated peptides) antibodies ELISA kit,  
113 with a cut-off of 5 RU/mL (Euroimmun, Luebeck, Germany). Among cases, a total of  
114 558 x-ray sets of hands were available. All x-rays were chronologically scored for  
115 assessment of bone destruction, as described previously<sup>28,29</sup>.

116 In the discovery cohort, the healthy controls were selected by adjusting with age and  
117 sex from the control cohort of a study in psoriasis<sup>30</sup>. In the validation cohort, the  
118 healthy subjects were recruited from Health Care Center of People's Hospital and  
119 were selected by adjusting with age and sex and without any disease records. All  
120 patients and healthy individuals were Han Chinese. The baseline demographic  
121 characteristics of patients and healthy controls are summarized in **Table 1** and the  
122 workflow of this study is described in **Supplementary Fig. 1**.

123 The study was approved by the Medical Ethics Committee of Peking University  
124 People's Hospital and informed consent was obtained from all participants.

125 **MHC target sequencing**

126 In discovery stage, the MHC region was sequenced using the targeted capture  
127 sequencing methodology, as described previously<sup>31</sup>. Briefly, genomic DNA was  
128 extracted using DNeasy Blood & Tissue Kits (QIAGEN, 69581). Following the  
129 manufacturer's instructions, whole genome shotgun libraries were built from 3 µg of  
130 genomic DNA (Illumina, San Diego, CA, USA). Then one µg of prepared sample  
131 library was hybridized to the capture probes for incubating at 65 °C, following the  
132 manufacturer's protocol (Roche NimbleGen, Madison, WI, USA). The targeted  
133 fragments were subsequently captured and samples were washed twice at 47°C and at  
134 room temperature. The Platinum Pfx DNA polymerase (Roche NimbleGen, Madison,  
135 WI, USA) were used to amplify the captured fragments. The PCR products were  
136 thereafter purified and sequenced with standard 2 × 90-bp paired-end reads on the  
137 Illumina HiSeq 2000 sequencer. Sequencing data for the 1001 healthy controls were  
138 cited and selected by adjusting with age and sex from a recent publication of psoriasis  
139 project<sup>30</sup>.

140 **Alignment and variant calling**

141 Sequenced samples were aligned to the NCBI human genome reference assembly  
142 (Build 37) using Burrows-Wheeler Aligner (BWA, version 0.5.9). On average, the  
143 MHC region was sequenced to a mean depth of 94 X, with 96.6% covered by at least  
144 one read and 93.1% covered by at least ten reads for cases. The data summary of the  
145 health controls is described in the previous study<sup>30</sup>. Then using SAMtools (v0.1.17),



146 the file was converted from SAM to BAM, the sorted and indexed BAM files were  
147 generated and duplicates were marked. To perform the realignment around known  
148 Indels, the BAM files were analyzed using the Genome Analysis Toolkit (GATK  
149 v1.4). All aligned read data were subjected to CountCovariates (GATK) on the basis  
150 of known single-nucleotide variants (SNVs) (dbSNP135) and TableRecalibration (in  
151 GATK) was used to recalibrate the base quality. Single nucleotide variants and indels  
152 were called jointly with GATK UnifiedGenotyper. Then, the GATK resource bundle  
153 was used for variant quality score recalibration, which includes known SNP sites from  
154 HapMap v3.3, dbSNP135, the Illumina Omni2.5 array, the Mills and the 1000G gold  
155 standard Indels as training data <sup>32</sup>. To build a genotype matrix as input for the  
156 subsequent analysis, the genotypes for each detected variant position were extracted  
157 from all samples.

### 158 **HLA typing**

159 In discovery cohort, a total of 26 highly polymorphic HLA genes were genotyped  
160 according to the Short Oligonucleotide Analysis Package (SOAP)-HLA<sup>31</sup>.  
161 SOAP-HLA is a flow of sequencing data analysis pipeline to type any HLA genes  
162 using capture sequenced data based on IMGT/HLA database with a high accuracy<sup>31</sup>.  
163 The following HLA genes were typed including *HLA-A*, *HLA-B*, *HLA-C*, *HLA-E*,  
164 *HLA-F*, *HLA-G*, *HLA-H*, *HLA-J*, *HLA-K*, *HLA-L*, *HLA-P*, *HLA-V*, *HLA-DRA*,  
165 *HLA-DRB1*, *HLA-DQA1*, *HLA-DQB1*, *HLA-DPA1*, *HLA-DPBI*, *HLA-DMA*,  
166 *HLA-DMB*, *HLA-DOA*, *HLA-DOB*, *HLA-MICA*, *HLA-MICB*, *HLA-TAP1*, and

167 *HLA-TAP2*. The amino acid sequence of each HLA allele was determined according  
168 to the IMGT/HLA database (Release 3.22.0).

169 In validation cohort, a total of 1415 individuals (604 cases and 811 controls) were  
170 genotyped for *HLA-A*, *-B*, *DRB1*, *-DPB1* and *-DQA1*. Genotypes of *HLA-A*, *-B*,  
171 *-DRB1* and *-DPB1* alleles were determined by using the next generation sequencing  
172 (NGS) method<sup>33</sup>. In brief, the amplicons were pooled and sheared randomly. Gel  
173 slicing was used to recover the sequencing libraries with fragments which include the  
174 library adapters between 400 and 700 bp in length. Then, the sequencing was  
175 performed on Illumina Miseq with PE 150 bp reads in a single run. Finally, using the  
176 unique variant calling and haploid sequencing assembly algorithm with the short  
177 sequence read as input, the genotypes were accurately obtained. *HLA-DQA1* were  
178 genotyped by sequencing of both exons 2 and 3 using the gold standard Sanger  
179 sequencing method<sup>34,35</sup>.

## 180 **Quality control**

181 Sequencing data were evaluated against a quality control metrics for all the samples.  
182 We restricted each individual as follows: (i) average sequencing depth  $\geq 4X$ ; (ii) 90%  
183 of the target region covered by 4X; (iii) GC content within 42%-48%. According to  
184 the criteria, a total of 58 samples from the discovery stage were filtered and removed  
185 for further analysis (**Supplementary Table 1**).  
186 After initial sample quality control for the MHC capture sequencing, we performed  
187 further filtering to identify the high-confidence SNPs and Indels in targeted region.

188 Following criteria were applied: i) pass ratio  $\geq 0.9$  (Q100 and Q500 were defined as  
189 pass for SNPs and Indels, respectively); ii) missing rate  $\leq 0.1$  (a depth of  $\geq 5X$  was  
190 considered as high quality; individuals failed to meet the criteria were considered as  
191 missing); iii) minor allele frequency (MAF)  $\geq 0.01$ ; iv) Hardy-Weinberg test  $P$ - value  
192  $\geq 1.0 \times 10^{-6}$  (**Supplementary Table 2**). For HLA types and amino acids, the same  
193 process was performed except for the pass ratio criteria (**Supplementary Table 2**).

#### 194 **Statistical analyses**

195 Using the same data processing procedure and analysis<sup>30,36</sup>, logistic regression model  
196 was applied to test the association between ACPA-positive RA and the variants in the  
197 MHC region, adjusting by gender. We define the HLA variants by including the four  
198 digit biallelic classical HLA alleles, biallelic SNPs, Indels, and biallelic HLA amino  
199 acid polymorphisms for respective residues within MHC region. The top five  
200 principal-components (PCs) were applied to control for population stratification in the  
201 discovery study. For the individual HLA allele and amino acid variant, the association  
202 was determined after stratifying the data using the relative predispositional effect  
203 (RPE) method<sup>37</sup>. Thus, the logistic regression model is as follows:

$$204 \quad \log it(p(Y_1)) = \beta_0 + \beta_1 x_k + \beta_2 sex + \beta_3 PCA \quad (1)$$

205 Where  $Y_1$  is RA status (1 if ACPA-positive RA and 0 otherwise) and  $x_k$  is the  
206 genotype at the  $k$ th variants. The  $\beta_0$  is the logistic regression intercept and  $\beta_1$ ,  $\beta_2$ ,  $\beta_3$   
207 are the effect size of  $k$ th variants, gender and the PCA respectively. The  $P$  values for

208 this test were observed while the odds ratio (OR) and standard error (SE) of OR were  
209 estimated.

210 To assess the independent effects of candidates identified in logistic analysis, we  
211 assumed the logistic regression model additionally including the most significant loci  
212 as covariates for the stepwise conditional regression analysis. If additional  
213 independent risk factors were identified, we further consecutively included them as  
214 covariates in the subsequent multivariate analyses in a forward conditional stepwise  
215 manner until none of loci met the cut off  $P$ -value<sup>30,38</sup>. Assuming that there may be  
216 linkage disequilibrium (LD) between the intergenic regulatory variants and specific  
217 genes, thus the independence of intergenic variants from its surrounding genes should  
218 be tested<sup>36</sup>. If the  $P$ -value of the intergenic variants is no longer less than the  
219 significant threshold after conditioning on the polymorphism sites (including SNPs,  
220 INDELs, amino acids, HLA type) of the nearby genes, we should perform condition  
221 analysis on its tagged genes, otherwise the intergenic variant is considered a real  
222 independent association locus. The unpaired T-test was applied to assess the  
223 significance of differences in radiological scores between two groups.

224 In discovery stage, a  $P$ -value less than  $1.0 \times 10^{-5}$  was suggested as significance  
225 threshold. In validation and combined stages, a conventional genome-wide statistical  
226 significance threshold of  $P$  less than  $5.0 \times 10^{-8}$  was applied. Analysis of radiological  
227 severity was conducted in R statistics program.

228 **Comparative modeling**

229 The comparative modeling was conducted using Modeller v9.14<sup>39</sup>. The crystal  
230 structure of HLA-DR1 (*DRA-DRB1\*0101*) (PDB ID: 1AQD) was employed as  
231 template for comparative modeling of *DQA1\*0303-DQB1\*0401*<sup>40</sup>. The overall  
232 sequence identity and similarity between *DQA1\*0303-DQB1\*0401* and HLA-DR1  
233 are 61.7% and 76.6%, respectively. The crystal structure of HLA-DR3  
234 (*DRA-DRB1\*03:01*) (PDB ID: 1A6A) has been solved and thereby was used as  
235 template for the comparative modeling of *DRA-DRB1\*13:01* and *DRA-DRB1\*13:02*<sup>41</sup>.  
236 The sequence identities of HLA-DR3 to *DRA-DRB1\*13:01* and *DRA1-DRB\*13:02*  
237 were 98.1%, and 97.8%, respectively. For each comparative modeling, ten models  
238 were generated, and the structure with the lowest probability density function total  
239 energy was selected for structural refinement. Energy minimization was performed  
240 using the Amber14 package with the Amber ff14SB force field<sup>42</sup>. Each structure  
241 model was solvated in an octahedron TIP3P water box and neutralized by adding  
242 proper counter ions. The distance of box boundary and structure model was set to 10  
243 Å. The particle-mesh-Ewald (PME) method<sup>43</sup> was used for the treatment of  
244 long-range electrostatic interactions. The non-bond interaction cutoff was set to 8.0 Å.  
245 Each simulation system was subjected to three stages of energy minimization,  
246 including (1) 5000 steps of steepest descent (SD) and 2000 steps of conjugate gradient  
247 (CG) minimization with harmonic restraints (10 kcal/Å) applied on all structural  
248 atoms; (2) 5000 steps of SD minimization and 2000 steps of CG minimization with  
249 reduced harmonic restraints (2 kcal/Å) on backbone atoms; (3) 10,000 steps of

250 steepest descent and 5000 steps of conjugate gradient minimization with all restraints

251 removed.

252

253

254

255 **RESULTS**

256 **HLA-DQ $\alpha$ 1:160D is the strongest genetic risk for ACPA-positive RA –**

257 **Discovery by MHC sequencing**

258 To define the independent association(s) and/or discover any novel variant(s)  
259 contributing to RA in addition to *HLA-DRB1*, we first conducted a capture sequencing  
260 of the whole MHC region in 357 patients with ACPA-positive RA and 1001  
261 previously sequenced healthy controls of Han Chinese. After quality control, a total of  
262 24,177 variants, 166 HLA types, and 1,283 amino acids were obtained  
263 **(Supplementary Table 2).**

264 In total, 563 variants (including HLA types and amino acids) showed significant  
265 associations by a cut-off of *P*-value less than  $1.0 \times 10^{-5}$  **(Supplementary Table 3).**

266 We found that the top association signal was mapped to *HLA-DQA1*, with a peak at  
267 HLA-DQ $\alpha$ 1 amino acid position 160 (DQ $\alpha$ 1:160D,  $P = 4.03 \times 10^{-14}$ , OR=2.42, 95%  
268 CI 1.92-3.04), followed by DQ $\alpha$ 1:160A ( $P = 2.01 \times 10^{-13}$ , OR=2.34, 95% CI  
269 1.86-2.93) and *DQA1\*0303* ( $P = 2.62 \times 10^{-13}$ , OR=3.02, 95% CI 2.25-4.06) **(Fig. 1**  
270 **and Supplementary Table 3).** *HLA-DRB1\*0405* allele, the putative greatest RA risk  
271 in Asians in previous reports, also showed a strong association with ACPA-positive  
272 RA, but fell out of the top 10 risk variants ( $P = 9.48 \times 10^{-12}$ , OR=3.22, 95% CI  
273 2.30-4.50) **(Supplementary Table 3).** These results indicated that by sequencing the  
274 entire MHC region we discovered HLA-DQ $\alpha$ 1:160D may be the top genetic risk for  
275 ACPA-positive RA in Han population, instead of the well-known *HLA-DRB1 \*0405*.

276 **HLA-DRβ1:37N has an independent protective effect on ACPA-positive RA**

277 By stepwise conditional analysis on HLA-DQα1:160D, the second signal was  
278 mapped to a list of SNPs, with a peak at rs7764856 (chr6\_32680640\_T\_A)  
279 (**Supplementary Table 4**). The SNPs are in high LD ( $r^2 = 0.72$ ) and all located in  
280 intergenic region between *DQA2* and *DQB1* according to NCBI RefSeq database  
281 (<http://www.ncbi.nlm.nih.gov/RefSeq>). An immediate significant association was  
282 observed for HLA-DRβ1:37N after these intergenic SNPs (**Fig. 1** and  
283 **Supplementary Table 4**). Of note, HLA-DRβ1:37N has an independent protective  
284 effect on ACPA-positive RA ( $P = 2.71 \times 10^{-6}$ , OR=0.51, 95% CI 0.39-0.68).  
285 Conditioning on DRβ1:37N, the intergenic SNPs lost their association and no  
286 additional independent association(s) reached the suggestive statistical significance  
287 threshold of  $P < 1.0 \times 10^{-5}$  (data not shown).

288 To assess whether DQα1:160D and DRβ1:37N were independent of each other, we  
289 performed the conditional analysis starting from DRβ1:37N. As shown in  
290 **Supplementary Fig. 2**, after conditioning on DRβ1:37N, DQα1:160D displayed even  
291 stronger association ( $P = 1.19 \times 10^{-18}$ , OR=3.53, 95% CI 2.67-4.68). This indicates  
292 that DQα1:160D also has an independent effect on ACPA-positive RA.

293 **The validation study confirms the findings discovered by capture sequencing**

294 To validate the findings discovered by capture sequencing, we performed Sanger or  
295 NGS to genotype *HLA-A*, *-B*, *-DRB1*, *-DQA1*, and *-DPB1* genes in an independent  
296 case-control cohort, consisting of 604 cases with ACPA-positive RA and 811 healthy



297 subjects. Joint analysis was then performed by combining the results from discovery  
298 and validation cohorts.

299 In line with the findings in the discovery stage, DQ $\alpha$ 1:160D showed consistent top  
300 association with ACPA-positive RA in the validation panel ( $P = 7.14 \times 10^{-19}$ , OR =  
301 2.23, 95% CI 1.87-2.66), followed by *DQA1\*0303* ( $P = 5.74 \times 10^{-18}$ , OR = 3.13, 95%  
302 CI 2.41-4.05) and DQ $\alpha$ 1:160A ( $P = 4.18 \times 10^{-17}$ , OR=2.10, 95% CI 1.77-2.50). A  
303 consistent association was also observed for *DRB1\*0405* ( $P = 5.76 \times 10^{-15}$ , OR = 3.40,  
304 95% CI 2.50-4.62) (**Supplementary Table 5**). After conditioning to DQ $\alpha$ 1:160D,  
305 though DR $\beta$ 1:96H became the second independent signal ( $P = 2.80 \times 10^{-10}$ , OR =  
306 1.68, 95% CI 1.43-1.97), it was followed by DR $\beta$ 1:37N ( $P = 1.93 \times 10^{-8}$ , OR=0.51,  
307 95% CI 0.40-0.65) (**Supplementary Table 6**). When conditioning on DR $\beta$ 1:37N, the  
308 DR $\beta$ 1:96H lost the association according to the genome-wide statistical significance  
309 threshold of  $P < 5.0 \times 10^{-8}$  ( $P = 1.18 \times 10^{-4}$ , OR = 1.45, 95% CI 1.20-1.76, data not  
310 shown).

311 Joint analysis of discovery and replication panels provided compelling evidence that  
312 HLA-DQ $\alpha$ 1:160D conferred the highest risk on ACPA-positive RA ( $P = 6.16 \times 10^{-36}$ ,  
313 OR=2.29, 95% CI 2.01-2.60), followed by DQ $\alpha$ 1:160A ( $P = 3.29 \times 10^{-33}$ , OR=2.17,  
314 95% CI 1.91-2.47) and *DQA1\*03:03* ( $P = 5.13 \times 10^{-33}$ , OR=3.17, 95% CI 2.63-3.83)  
315 (**Fig. 2, Supplementary Table 7, and Table 2**). After conditioning to DQ $\alpha$ 1:160D,  
316 though the DR $\beta$ 1:96H remained as the second independent signal ( $P = 4.90 \times 10^{-16}$ ,  
317 OR=1.64, 95% CI 1.45-1.84, **Fig. 2 and Supplementary Table 7**), DR $\beta$ 1:37N also

318 displayed strong association ( $P = 5.81 \times 10^{-16}$ , OR=0.49, 95% CI 0.41-0.58, **Fig. 2**,  
319 **Supplementary Table 7**, and **Table 2**). When conditioning on DR $\beta$ 1:37N, there was  
320 no additional independent association(s) reached the study-wide statistical  
321 significance of  $P < 5.0 \times 10^{-8}$  (data not shown).

322 **Exclusive dissection of *HLA-DRB1* indicates that DR $\beta$ 1 variants could be strong**  
323 **risks for ACPA-positive RA, if the effect of *HLA-DQA1* is ignored.**

324 As mentioned above, *HLA-DRB1* was recognized as the strongest RA risk in previous  
325 studies, especially for ACPA-positive RA and variations *DRB1\*0405*, DR $\beta$ 1:11, 13,  
326 57, 74, and 71 have been shown to confer risks for RA in Asian patients<sup>10</sup>. Thus, we  
327 next investigated RA association at *HLA-DRB1* separately. As shown in  
328 **Supplementary Table 8**, multiple alleles at *HLA-DRB1* showed strong associations,  
329 with DR $\beta$ 1:120N ( $P = 6.46 \times 10^{-28}$ , OR=2.27, 95% CI 1.96-2.63), *DRB1\*0405* ( $P =$   
330  $6.55 \times 10^{-28}$ , OR=3.40, 95% CI 2.73-4.23), and DR $\beta$ 1:11V ( $P = 2.43 \times 10^{-27}$ ,  
331 OR=2.45, 95% CI 1.94-2.60) being the top three risks. When conditioning on either  
332 DR $\beta$ 1:11V or :120N, the second signal was seen for DR $\beta$ 1:31I ( $P = 2.23 \times 10^{-18}$ ,  
333 OR=1.93, 95% CI 1.67-2.24) and DR $\beta$ 1:13F ( $P = 2.90 \times 10^{-17}$ , OR=1.82, 95% CI  
334 1.58-2.09) (**Fig. 3**). After further conditioning to either DR $\beta$ 1:13F or :31I, strong  
335 association signals were observed for *DRB1\*04:05* ( $P = 6.26 \times 10^{-11}$ , OR=2.53, 95%  
336 CI 1.92-3.35) and DR $\beta$ 1:57S ( $P = 3.14 \times 10^{-9}$ , OR=1.81, 95% CI 1.49-2.20),  
337 respectively. Then we continued conditioning on DR $\beta$ 1:57S, DR $\beta$ 1:74A showed a  
338 suggestive association with ACPA-positive RA ( $P = 5.09 \times 10^{-7}$ , OR = 0.72, 95% CI

339 0.63-0.82). When conditioning on DR $\beta$ 1:74A, DR $\beta$ 1:71E also showed a suggestive  
340 association ( $P = 2.95 \times 10^{-6}$ , OR=0.37, 95% CI 0.24-0.56). Our results indicated that  
341 if the effect of *DQA1* is ignored, *DRB1*\*0405, amino acid variants at DR $\beta$ 1:11, 13, 57,  
342 74, and 71 can come up and be very strong risk factors for ACPA-positive RA.

343 Next, we compared the individual amino acid frequencies between Han Chinese and  
344 European populations. As shown in **Fig. 4A**, both DQ $\alpha$ 1:160D and DQ $\alpha$ 1:160A are  
345 common amino acids in Han Chinese and were significantly increased in  
346 ACPA-positive RA patients. However, the two amino acids have not been detected in  
347 European population<sup>9</sup>. For amino acid positions 11, 13, 57, 71 and 74 in DR $\beta$ 1, the  
348 amino acid frequencies are similar between two ethnic groups or case and controls,  
349 except for a few amino acids. For example, DR $\beta$ 1:11D, 13G, 57V, and 74E are  
350 common in Han Chinese but rare in Europeans (**Fig. 4B, C, D, F**). In contrast,  
351 DR $\beta$ 1:71K is rare in Han Chinese but common in Europeans (**Fig. 4E**).

352 ***DQA1*\*0303, an allele encoding DQ $\alpha$ 1:160D, confers increased risk of joint**  
353 **damage in early ACPA-positive RA**

354 DQ $\alpha$ 1:160D is encoded by two alleles, i.e. *DQA1*\*0302 and \*0303. We next  
355 examined whether the top susceptible factor DQ $\alpha$ 1:160D and its encoding alleles  
356 confer a risk for the severity of joint damage in ACPA-positive RA. A total of 557  
357 patients with available SHS data were divided into three groups according to the  
358 disease durations ( $\leq 1$  years, 1–10 years, or  $\geq 10$  years). Overall, there was no  
359 difference in SHS according to either DQ $\alpha$ 1:160 variations or its coding allele

360 polymorphisms in three disease stages (data not shown). As smoking is a  
361 well-established environmental factor contributing to ACPA-positive RA  
362 susceptibility and severity, we further stratified the patients by smoking status.  
363 Though there was no significant difference in SHS between DQ $\alpha$ 1:160D carriers and  
364 non-carriers after stratifying by smoking status, in the early disease stage one of its  
365 coding allele *DQAI\*0303* showed high impact on radiographic scores in smoking  
366 group ( $P = 3.02 \times 10^{-5}$ ). Similarly, in early disease stage *DQAI\*0303* carriers with  
367 smoking had higher radiographic scores than *DQAI\*0303* carriers without smoking  
368 ( $P = 4.05 \times 10^{-8}$ , **Fig. 5a**). In the early disease stage *DRBI\*0405* also showed a higher  
369 impact on radiographic score in smoking group ( $P = 3.02 \times 10^{-5}$ ). *DRBI\*0405*  
370 carriers with smoking had increased radiographic scores, compared to *DRBI\*0405*  
371 carriers without smoking ( $P = 6.96 \times 10^{-6}$ , **Fig. 5b**). These findings are consistent  
372 with previous finding that the gene–environment interaction between *DRBI* variants  
373 and smoking contribute to ACPA-positive RA. Our data also suggest that DQ $\alpha$ 1:160  
374 coding allele *DQAI\*0303* has high impact on radiographic severity of ACPA-positive  
375 RA, especially in patients with early disease and smoking.

376 **Additional negative charge of D160 $\alpha$  enhances the interaction with DQ $\beta$ 1,**  
377 **leading to an increased T cell activation**

378 MHC class II molecules could present in the form of either heterodimers or dimer of  
379 dimers<sup>40,44,45</sup>. The dimer of dimers appears to play an important role in T cell response  
380 to low affinity antigens by enhancing overall affinity between MHC/peptide and

381 TCR<sup>45,46</sup>. The electrostatic interactions between the interface residues are critical for  
382 maintaining structural stability as well as T cell activation<sup>47</sup>. According to sequence  
383 analysis, D160 $\alpha$  locates far away from antigen binding groove and should impose  
384 little influence on epitope binding. To investigate the potential function of  
385 DQ $\alpha$ 1:160D, we constructed the dimer of dimer structure for  
386 *DQA1\*0303-DQB1\*0401* by comparative modeling, as it is the major D160 $\alpha$   
387 encoding haplotype in Han Chinese (69.0% from our data and 56% in the Han MHC  
388 database<sup>30</sup>). As shown in **Fig. 6A**, D160 $\alpha$  is adjacent to the dimer of dimer interface  
389 and may contribute to the stability of dimer of dimers. Strong electrostatic interactions  
390 are observed between negative DQ $\alpha$ 1 interface residues (D161 $\alpha$ , E182 $\alpha$  and E184 $\alpha$ )  
391 and positive DQ $\beta$ 1' interface residues (R105 $\beta$ , H111 $\beta$  and H112 $\beta$ ). Compared with  
392 non-charged A160 $\alpha$  or S160 $\alpha$  coded by other *DQA1* alleles, the additional negative  
393 charge introduced by D160 $\alpha$  further enhances the interaction with DQ $\beta$ 1 in the other  
394 dimer, which may lead to an increased T cell activation (**Fig. 6B**).

395 **The negatively charged P9 pockets from DR $\beta$ 1: 37N encoding alleles benefit**  
396 **electrostatic interaction and epitope P9 arginine binding**

397 It is well accepted that *HLA-DRB1* susceptibility alleles are strongly associated with  
398 ACPA-positive RA, and its encoded molecules preferentially present the citrullinated  
399 autoantigens<sup>48</sup>. The susceptibility is determined by the electrostatic property of  
400 antigen binding pockets and the ability to differentially recognize citrullinated  
401 antigens. The positively charged antigen binding pocket in RA-susceptible alleles

402 preferentially accommodate citrullinated antigens, whereas electronegative or  
403 electroneutral pockets in RA-resistant alleles can bind both arginine and citrullinated  
404 antigens<sup>49</sup>. The amino acid residues at position 37 in DR $\beta$ 1 are located within the P9  
405 pocket of antigen binding groove. By sequence analysis, we found four alleles  
406 containing an asparagine at position DR $\beta$ 1:37 (Asn37 $\beta$  or 37N), including  
407 *DRB1\*03:01*, *\*09:01*, *\*13:01*, and *\*13:02*. Though *DRB1\*0901* was reported to be  
408 the risk allele for RA in Koreans<sup>11</sup>, its influence on developing of ACPA-positive RA  
409 subgroup seemed protective<sup>50,51</sup>. We then constructed the structure models for other  
410 allele-containing haplotypes by comparative modeling. The electrostatic potential  
411 surface and the residues of the P9 pocket from the three models are shown in **Fig. 7**,  
412 respectively. *DRA1-DRB1\*03:01*, *DRA1-DRB1\*13:01* and *DRA1-DRB1\*13:02* share  
413 identical P9 pocket, which is composed of Asn69 $\alpha$ , Met73 $\alpha$ , Tyr30 $\beta$ , Asn37 $\beta$ , Val38 $\beta$   
414 and Asp57 $\beta$  (**Fig. 7D, E and F**). The electrostatic potential surface analysis indicates  
415 that P9 pockets of *DRA1-DRB1\*03:01*, *DRA1-DRB1\*13:01* and *DRA1-DRB1\*13:02*  
416 are negatively charged and could benefit electrostatic interaction with epitope P9  
417 arginine (**Fig. 7A, B and C**). Collectively, all three alleles containing negatively  
418 charged P9 pocket of Asn37 could bind the epitope P9 arginine and thus may result in  
419 a decreased RA susceptibility.  
420

421 **DISCUSSION**

422 In this study, by applying the target capture sequencing, we fine mapped the  
423 ACPA-positive RA risks within the MHC region. A key finding of this study is the  
424 major influence of HLA-DQ $\alpha$ 1:160D on ACPA-positive RA instead of the  
425 well-described RA-risk *HLA-DRB1* alleles in Han ancestry. HLA-DR $\beta$ 1:37N is an  
426 independent protective factor for ACPA-positive RA. The novel findings are  
427 confirmed in an independent case-control cohort by classical HLA genotyping.  
428 Furthermore, one of DQ $\alpha$ 1:160D encoding allele *DQA1\*0303* confers high risk for  
429 joint damage in patients with smoking in early disease.

430 Previously, a number of reports have shown that the greatest genetic risk for  
431 ACPA-positive RA came from certain *HLA-DRB1* alleles<sup>52-54</sup>, in which the  
432 *DRB1\*0405*, DR $\beta$ 1:11, 13, 57, 74, and 71 were reported as strong risks for Asian RA  
433 patients<sup>10</sup>. However, even though the classical *HLA-DRB1* alleles have been reported  
434 to confer strong RA risks in different populations, other HLA genes have also been  
435 shown to associate with ACPA-positive RA. For example, Raychaudhuri *et al.* have  
436 reported that single-amino-acid variations in HLA-B (at position 9) and HLA-DP $\beta$ 1  
437 (at position 9) were strong risks for seropositive RA, besides other three amino acid  
438 positions (11, 71 and 74) in HLA-DR $\beta$ 1<sup>9</sup>. Another study also reported a strong  
439 association with ACPA-positive RA at HLA-A amino acid position 77<sup>15</sup>. It has thus  
440 been a challenge to draw definitive conclusion concerning the role of different MHC  
441 class II alleles in susceptibility to ACPA-positive RA.

442 In present study, we identified HLA-DQ $\alpha$ 1:160D as the strongest and independent  
443 genetic risk instead of the well-known *HLA-DRB1* alleles for ACPA-positive RA in  
444 Han population. Our novel finding could be rationally explained by the fact that  
445 DQ $\alpha$ 1:160D is encoded by two alleles, i.e. *DQAI*\*0302 and \*0303. Though the two  
446 alleles are common in East Asians, they are rare variants in  
447 Caucasians<sup>55,56</sup>(<http://www.allelefrequencies.net/hla6006a.asp>). Thus, the SNPs  
448 tagging *DQAI*\*0302 and \*0303 may not be included in DNA beadchips for GWAS.  
449 This could help to explain why DQ $\alpha$ 1:160D and its coding alleles \*0302 and \*0303  
450 have not been detected or suggested to be risk factors for RA, though many RA  
451 GWASs and chip-based genotypic imputations have been performed, including a  
452 recent large-scale HLA imputation study of ACPA-positive RA in Japanese  
453 population<sup>57</sup>. Furthermore, differences between our findings and previously reported  
454 HLA associations could also be due to the progress in HLA typing methodology using  
455 sequencing technology that covers the whole MHC class II region, which allows  
456 typing of HLA alleles at a much higher resolution than before. Notably, however, in  
457 our previous work we have showed that *HLA-DQAI*\*03 is significantly associated  
458 with RA susceptibility (allelic frequencies: 0.351 vs. 0.256,  $P = 4.76 \times 10^{-4}$ , OR =  
459 1.56, 95% CI 1.22–2.03)<sup>8</sup>. Consistently with our finding, Raychaudhuri<sup>9</sup> also reported  
460 the allelic frequencies of *DQAI*\*03 to be increased in seropositive RA patients  
461 compared to healthy controls (0.462 vs. 0.185). Moreover, *DQAI*\*0302 has been  
462 reported as a genetic risk for Vitiligo and Ocular myasthenia gravis in Chinese Han



463 population<sup>58,59</sup>, and for Type 1 diabetes mellitus in children in Japanese population<sup>60</sup>.

464 In agreement with previous studies, our data indicated that *HLA-DRB1\*0405*,  
465 *DRβ1:11, 13, 57, 74, and 71* could be strong risks for ACPA-positive RA, if the  
466 *DQA1* association was not noted.

467 It has been well established that smoking is a risk factor linked to RA susceptibility  
468 and severity and this risk is increased by a gene-environment interaction between  
469 smoking and *DRB1* alleles and restricted to ACPA-positive RA. Consistent with  
470 previous finding<sup>14</sup>, we now also show that *DRB1\*0405* carriers with smoking had  
471 increased radiographic damage in ACPA-positive RA patients at an early stage of  
472 disease. We further show that one of *DQα1:160* coding allele *DQA1\*0303* has high  
473 impact on radiographic severity of ACPA-positive RA, especially in patients with  
474 smoking and in early disease. Our data thus supports the notion that smoking, in the  
475 presence of RA-risk genetic background, may trigger immunity to citrullinated  
476 proteins and lead to RA development and accelerate joint damage.

477 Although *DQα1:160* locate far away from antigen binding groove and may have little  
478 influence on epitope binding, it is adjacent to the *DQα-DQβ* dimer of dimer interface.  
479 Previous study has reported that the amino acid substitutions in the dimer of dimer  
480 interface of *HLA-DRβ1* inhibited *CD4<sup>+</sup>* T cell activation<sup>61</sup>. Therefore, we assume that  
481 the residue substitutions at *DQα1:160* may contribute to the dimer of dimer structure  
482 stability and T cell activation. Indeed, by electrostatic interaction analysis we  
483 observed a strong electrostatic interaction between negatively charged *DQα1*

484 interface residues and positively charged DQ $\beta$ 1' interface residues. Compared to the  
485 non-charged A160 $\alpha$  or S160 $\alpha$ , the additional negative charge introduced by D160 $\alpha$   
486 further enhances the interaction with DQ $\beta$ 1, leading to an increased T cell activation.  
487 The DR $\beta$ 1:37 residue is located within pocket P9 on the beta-sheet floor with their  
488 side chains oriented into the peptide-binding groove. Modification of DR $\beta$ 1:37  
489 residue is sufficient to alter the T-cell receptor peptide recognition<sup>62,63</sup>. Pocket P9 of  
490 class II molecules has been linked to several autoimmune diseases. For example,  
491 amino acid variations within the pocket P9 of HLA-DR $\beta$  have been shown to  
492 associate with increased risk for primary Sjogren's syndrome<sup>64</sup>. DR $\beta$ 1:37N was a risk  
493 residue for susceptibility to primary sclerosing cholangitis<sup>65</sup>. In present work, by  
494 electrostatic potential surface analysis we showed that three DR $\beta$ 1:37N encoding  
495 alleles \*03:01, \*13:01, and \*13:02 have negative charged P9 pocket, which benefits  
496 electrostatic interaction and could bind with epitope P9 arginine, thus could at least  
497 partly explain its protective effect for ACPA-positive RA discovered in present study.  
498 In summary, by sequencing of the entire MHC region for discovery and HLA  
499 genotyping for validation in two independent cohorts, our study demonstrates that  
500 *HLA-DQA1*, instead of *HLA-DRB1*, confers the greatest independent genetic risk for  
501 ACPA-positive RA in Chinese Han. Our study also illustrates the value of deep  
502 sequencing for fine mapping real risk variants in the MHC region.  
503

504 **ACKNOWLEDGEMENTS**

505 We thank the staff from Department of Rheumatology and Immunology, People's  
506 Hospital, Peking University, for recruiting patients and healthy controls, the staff from  
507 the Computing Platform of the Center for Life Sciences, Peking University, for  
508 assisting the functional prediction analysis, and the staff from BGI-Shenzhen who  
509 contributed to the technical assistance. We wish to thank the patients and healthy  
510 volunteers for their cooperation and for giving consent to participate in this study.  
511 This work was supported in part by the National Key Basic Research Program of  
512 China (973 Program) (No. 2014CB541901), the National Natural Science Foundation  
513 of China (No. 81120108020, No. 31711530023, No. 31670915, No. 31470875, No.  
514 31270914, No. 31530020, No. 31700794, No. 81401329, No. 81771678, No.  
515 81471601, No. 81671604), the National Key Research and Development Program of  
516 China (No. 2016YFA05022300), Beijing Natural Science Foundation (No. 7162192),  
517 and Shenzhen Municipal of Government of China (No. CXB201108250094A).

518 **AUTHOR CONTRIBUTIONS**

519 J.G., X.X. and Z.L. conceptualized and designed the study. X.Z and L.K. participated  
520 in the study design and supervised manuscript writing. J.G., T.Z. and H.C.  
521 coordinated and supervised the study teams. J.G., X.W.L., T.Z., H. L., and H.C.  
522 conducted data management and manuscript preparation. T.Z., X.W.L., Y.W.Z., X.M.  
523 and H.J.Y. conducted the statistical analyses. H.M.Y., H.J.J., J.W., L.S., L.P., L.H.L.  
524 L.L. and K.Y. participated in data interpretation and manuscript writing. M.L., Y.Z.,

525 X.S., F.H., Y.D., M.Z., H.J., Xin L., Y.H., Xu L., Y.Y., X.W., X.Z., and Y.S.

526 conducted sample selection and participated in data management. All coauthors edited

527 and reviewed the final version of manuscript.

528 **COMPETING INTERESTS**

529 The authors declare no competing financial interests.

530

531

532 **List of Figures**

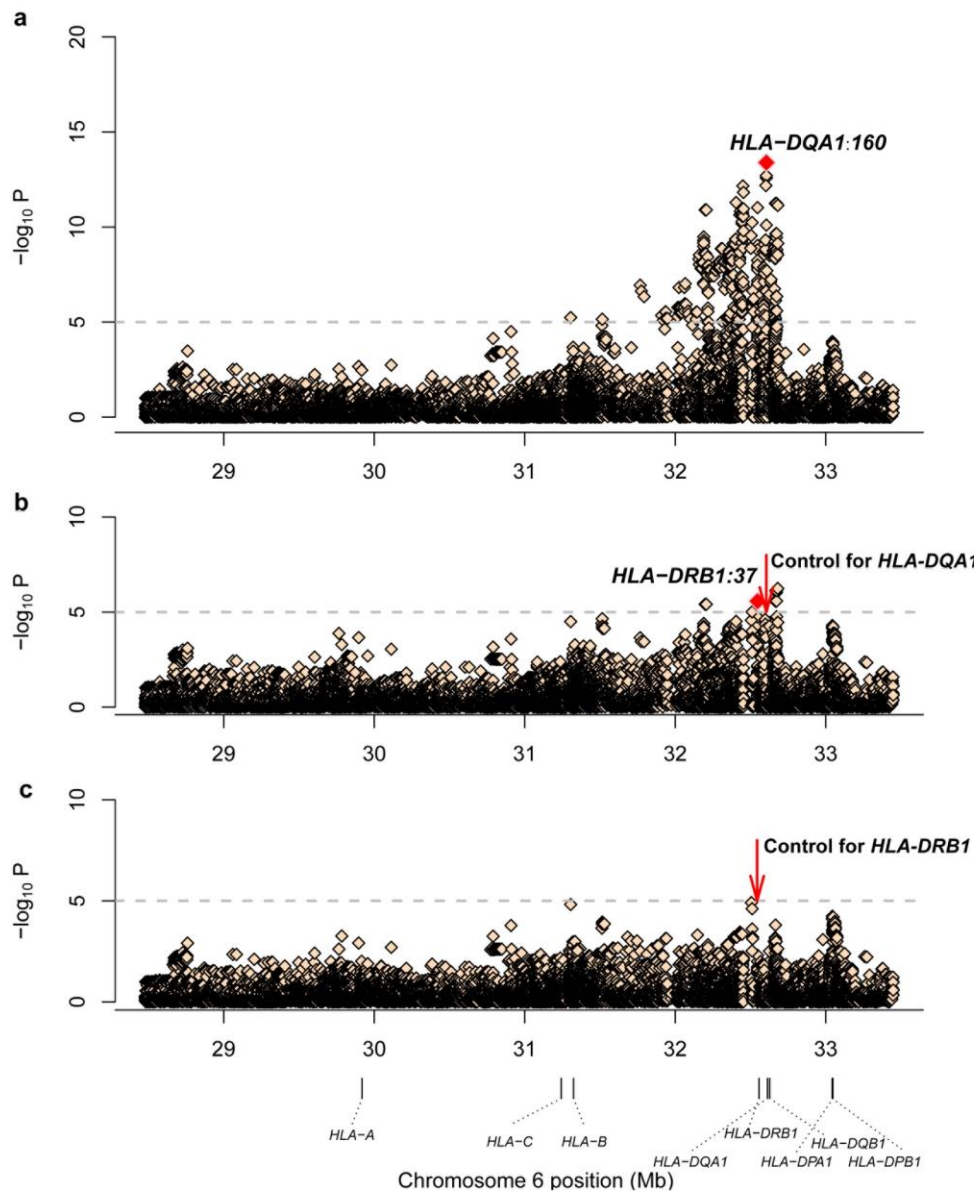

533

534 **Figure 1** Plots of stepwise conditional analysis for ACPA-positive RA in

535 **MHC region for discovery cohort.** Each diamond represents  $-\log_{10}(P)$  of the

536 variants, including SNPs, Indels, classical HLA alleles and amino acid

537 polymorphisms of HLA genes. The dotted horizontal line represents the suggestive

538 significance threshold of  $P = 1 \times 10^{-5}$ . The bottom panel indicates the physical

539 positions of the HLA genes on chromosome 6 (NCBI Build 37). (a) The major

540 genetic determinants of ACPA-positive RA mapped to HLA-DQ $\alpha$ 1 corresponding  
541 Asp-160. **(b)** Subsequent conditional analyses controlling for HLA-DQ $\alpha$ 1 Asp-160  
542 reveal an independent association at HLA-DR $\beta$ 1 corresponding Asn-37. **(c)** Upon  
543 controlling for HLA-DQ $\alpha$ 1 Asp-160 and HLA-DR $\beta$ 1 Asn-37, no additional  
544 significant association signal was observed.  
545

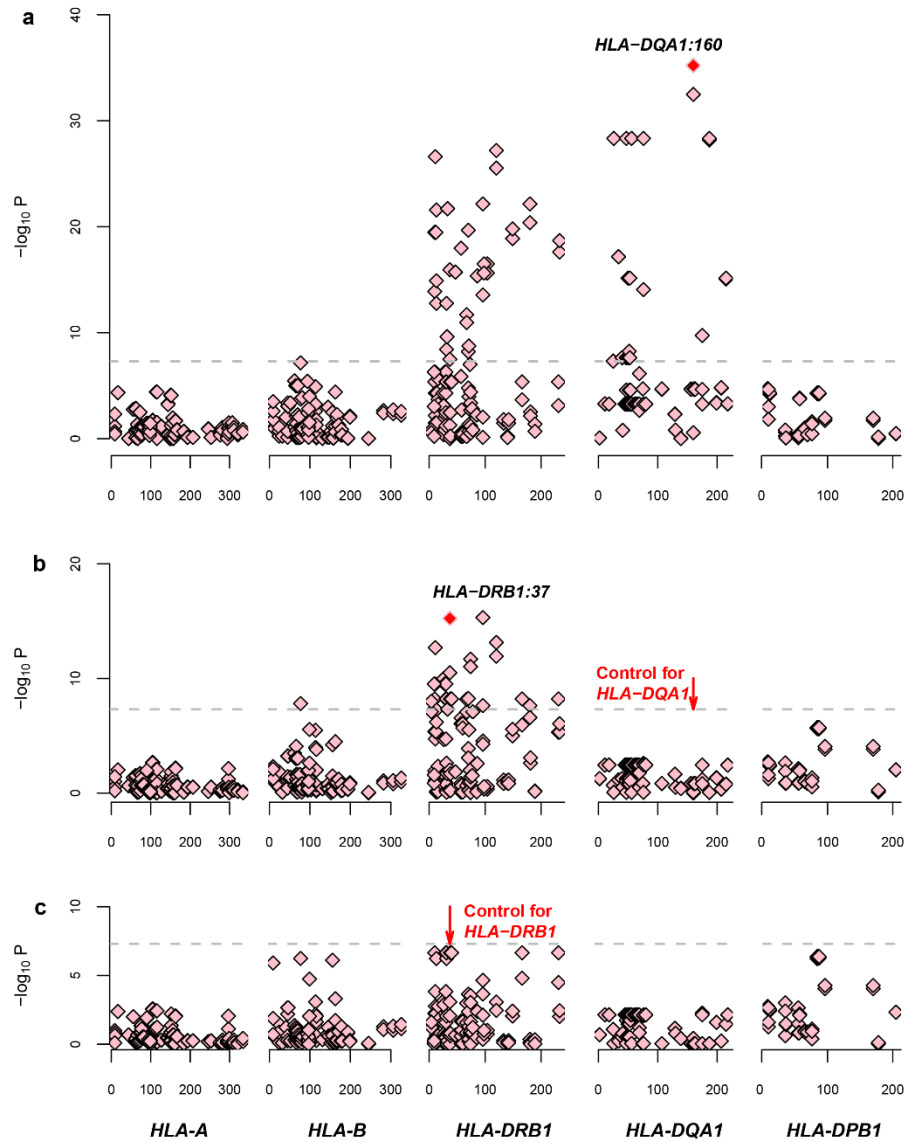

546

547 **Figure 2 Joint analysis of discovery and replication panels in the MHC region.**

548 The association for each locus used for conditioning (*HLA-DQA1*, *HLA-DRB1*) is

549 shown in red in each panel. For each panel, the horizontal axis shows the position of

550 amino acid for each HLA gene and the vertical axis shows negative

551 log<sub>10</sub>-transformed *P* values for association. The dashed horizontal line corresponds to

552 the significance threshold of  $P=5 \times 10^{-8}$ .

553

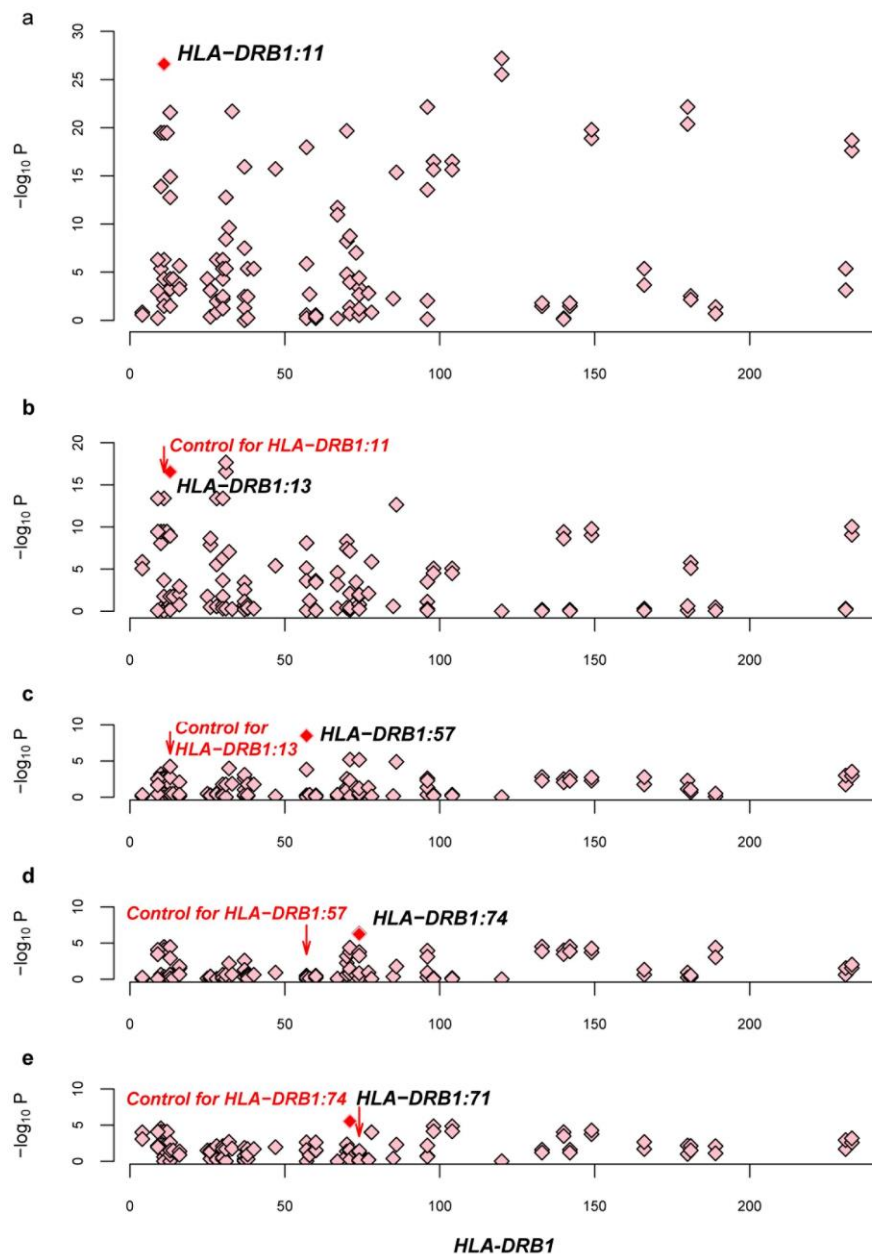

554

555 **Figure 3 Plots of stepwise conditional analysis for HLA-DRβ1 in combined**

556 **cohort. (a)** Amino acid position 120 represents the strongest association with ACPA–

557 positive RA ( $P < 10^{-27}$ ), followed by position 11 ( $P < 10^{-26}$ ). **(b)** Controlling for

558 position 11 or 120, position 13 is an independent risk for ACPA–positive RA ( $P =$

559  $2.90 \times 10^{-17}$ ). **(c)** Controlling for positions 11 and 13, position 57 showed an

560 independent association ( $P = 3.14 \times 10^{-9}$ ). **(d)** Controlling for positions 11,13 and 57,



561 position 74 becomes a suggestive signal ( $P = 5.09 \times 10^{-7}$ ) (e) Conditioning on  
562 positions 11,13, 57 and 74 revealed a suggestive association for amino acid 71  
563 ( $p=2.95 \times 10^{-6}$ ).  
564

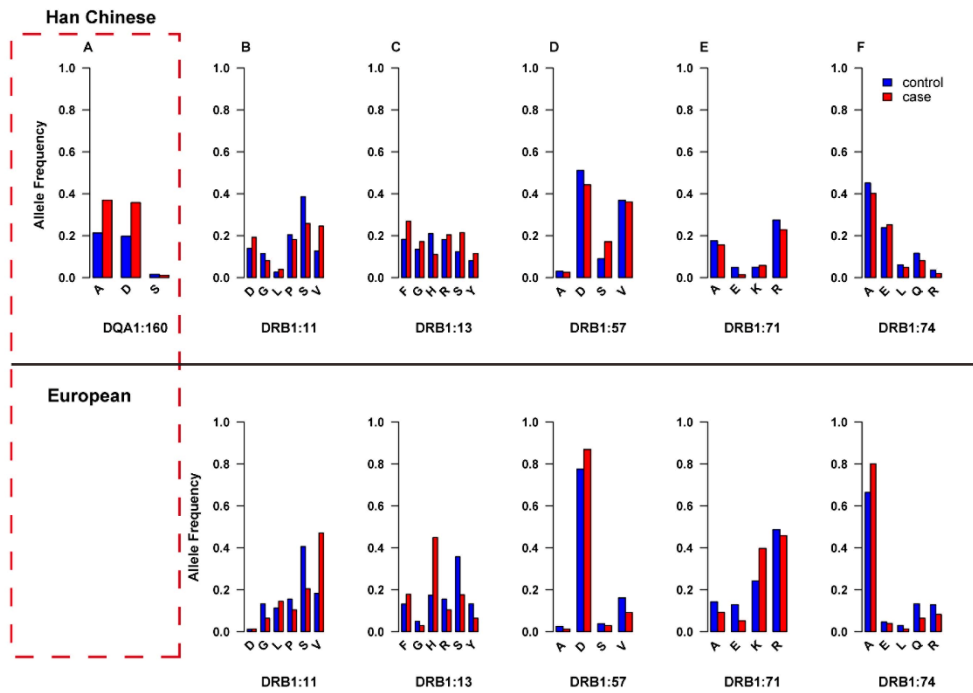

565

566 **Figure 4 Comparison of individual amino acid frequencies within DQ $\alpha$ 1:160**

567 **and DR $\beta$ 1:11, 13, 57, 71, and 74 in Han Chinese and European populations.** The

568 individual amino acid frequencies are plotted in healthy controls (blue) and cases

569 (red). Upper panel shows the amino acid frequencies in Han Chinese population (the

570 data derived from present study). Lower panel shows the amino acid frequencies in

571 European population (the data cited from Raychaudhur's study<sup>9</sup>).

572

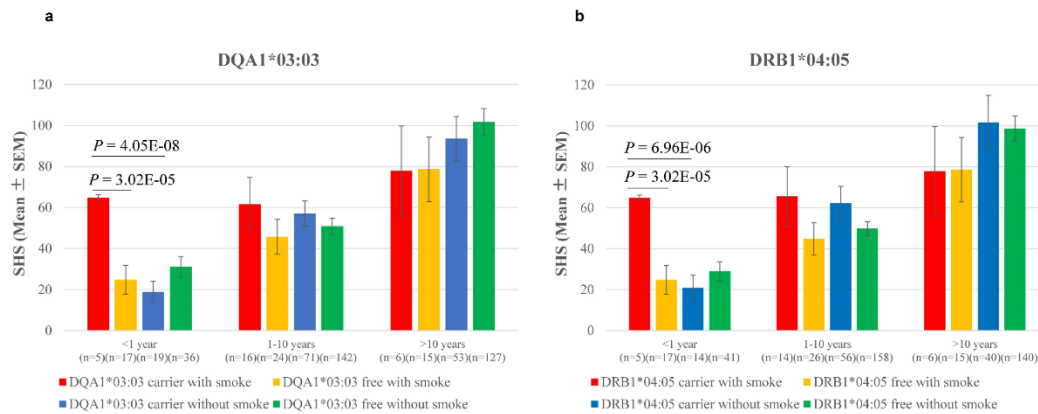

573

574 **Figure 5 Impact of *DQA1\*0303* on risk of joint damage in ACPA-positive RA.**

575 (a) In early disease stage *DQA1\*0303* showed high impact on radiographic scores in

576 smoking group ( $P = 3.02 \times 10^{-5}$ ). Similarly, *DQA1\*0303* carriers with smoking had

577 higher radiographic scores than *DQA1\*0303* carriers without smoking ( $P = 4.05 \times$

578  $10^{-8}$ ). (b) In early disease stage *DRB1\*0405* also showed a high impact on

579 radiographic score in smoking group ( $P = 3.02 \times 10^{-5}$ ). *DRB1\*0405* carriers with

580 smoking had increased radiographic scores, compared to *DRB1\*0405* carriers without

581 smoking ( $P = 6.96 \times 10^{-6}$ ).

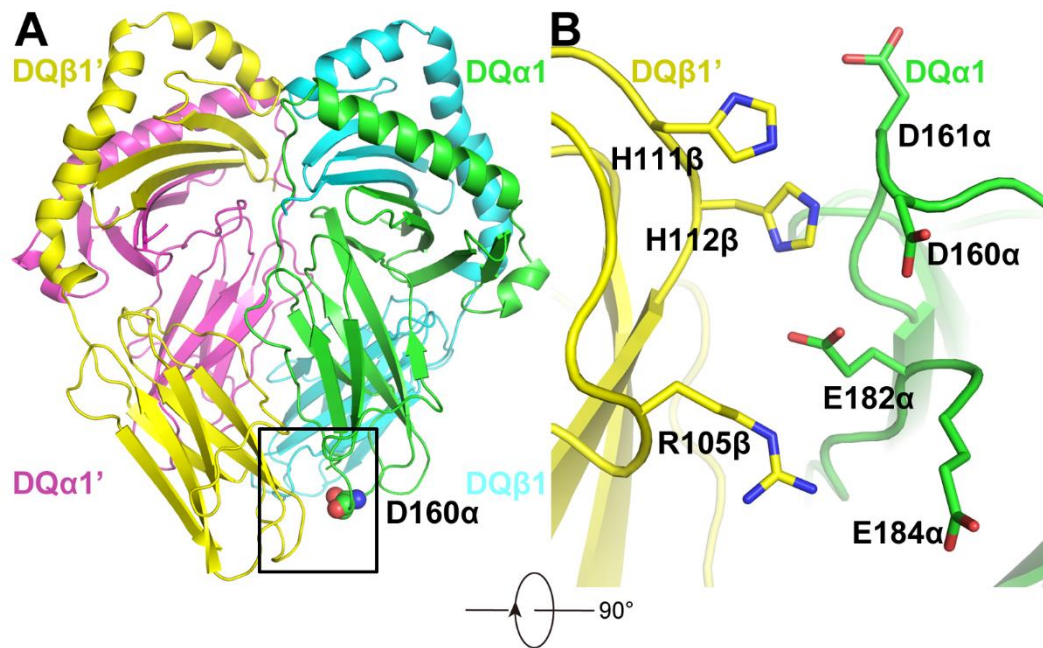

582

583 **Figure 6** The dimer of dimer structure of *DQA1\*0303-DQB1\*0401*. (A)

584 Overall dimer of dimer structure of *DQA1\*0303-DQB1\*0401*. One dimer is

585 composed of DQα1 and DQβ1, whereas the other dimer is composed of DQα1' and

586 DQβ1'. The DQα1, DQβ1, DQα1' and DQβ1' were shown as green, cyan, purple,

587 and yellow cartoon, respectively. (B) The interface of dimer of dimer structure. DQα1

588 and DQβ1' residues involved in the interaction are displayed sticks and their carbon

589 atoms are colored in green and yellow, respectively, whereas nitrogen and oxygen

590 atoms are colored in blue and red, respectively.

591

592

593

594

595

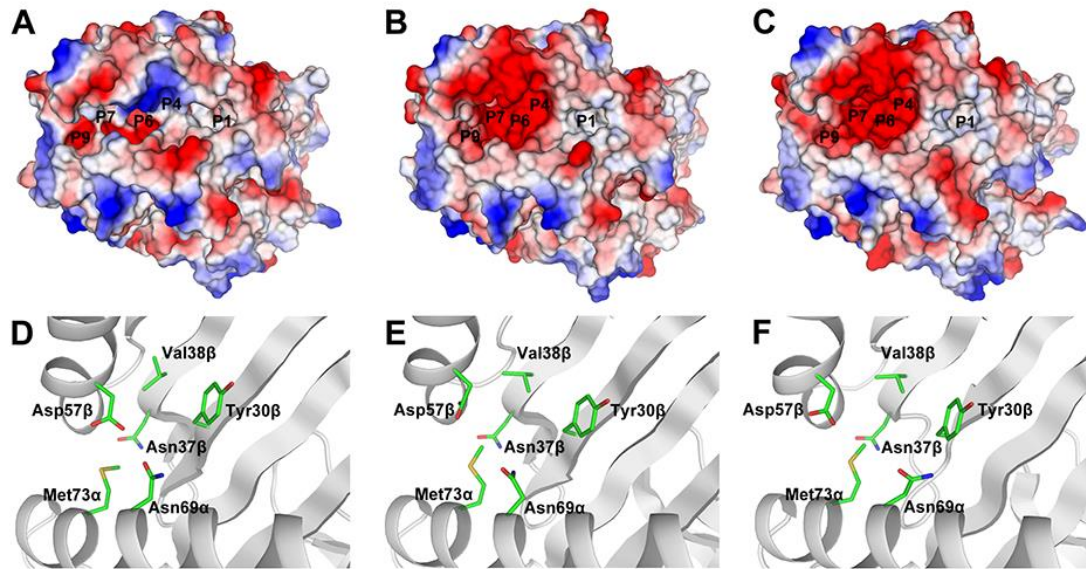

596

597 **Figure 7** The electrostatic potential surface of *DRA1-DRB1\*03:01* (A)

598 *DRA1-DRB1\*13:01* (B) and *DRA1-DRB1\*13:02* (C). All structure models are

599 displayed by surface. The positive, neutral and negative regions are colored in blue,

600 white and red, respectively. The P9 pocket structure of *DRA1-DRB1\*03:01* (D),

601 *DRA1-DRB1\*13:01* (E), and *DRA1-DRB1\*13:02* (F). HLA molecules and pocket

602 residues are shown as grey cartoon and green sticks, respectively.

603

604

605

606

607 **Table 1 Demographic characteristic of the study cohorts**

|                                       | <b>Stage I (Discovery)</b>      | <b>Stage II (Validation)</b>    |
|---------------------------------------|---------------------------------|---------------------------------|
| No. of patients/ controls             | 357/1001                        | 604/811                         |
| <b>Demographic characteristics</b>    |                                 |                                 |
| Female (%)                            | 80.4/ 72.4                      | 81.0/82.2                       |
| Age, mean $\pm$ SD years              | 57.4 $\pm$ 12.1/43.0 $\pm$ 15.7 | 54.6 $\pm$ 13.0/45.3 $\pm$ 13.6 |
| <b>Clinical characteristics</b>       |                                 |                                 |
| Age at onset, mean $\pm$ SD years     | 47.1 $\pm$ 13.9                 | 45.3 $\pm$ 14.6                 |
| Disease duration, mean $\pm$ SD years | 10.3 $\pm$ 8.9                  | 9.4 $\pm$ 8.7                   |
| SHS, mean $\pm$ SD (n)*               | 80.5 $\pm$ 63.0 (336)           | 41.6 $\pm$ 51.8 (212)           |

608 RA: rheumatoid arthritis; ACPA: anti-citrullinated proteins antibodies; SHS: modified

609 Sharp-van der Heijde score; SD: standard deviation.

610 \*: the case number when data were available.

611

612

613 **Table 2 Independent effects of DQ $\alpha$ 1:160D and DR $\beta$ 1:37N in ACPA-positive RA**  
614

| Amino<br>Acid      | Discovery stage          | Validation stage    |                          | Combined stage      |                          |                     |
|--------------------|--------------------------|---------------------|--------------------------|---------------------|--------------------------|---------------------|
|                    | <i>P</i> -value          | OR<br>(95% CI)      | <i>P</i> -value          | OR<br>(95% CI)      | <i>P</i> -value          | OR<br>(95% CI)      |
| DQ $\alpha$ 1:160D | 4.03 x 10 <sup>-14</sup> | 2.42<br>(1.92-3.04) | 7.14 x 10 <sup>-19</sup> | 2.23<br>(1.87-2.66) | 6.16 x 10 <sup>-36</sup> | 2.29<br>(2.01-2.60) |
| DR $\beta$ 1:37N   | 2.71 x 10 <sup>-6</sup>  | 0.51<br>(0.39-0.68) | 1.93 x 10 <sup>-8</sup>  | 0.51<br>(0.40-0.65) | 5.81 x 10 <sup>-16</sup> | 0.49<br>(0.41-0.58) |

615

616 RA: rheumatoid arthritis; ACPA: anti-citrullinated proteins antibodies;

617 OR (95% CI): odds ratio (95% confidence interval).

618

619

620 **REFERENCES**

- 621 1. Klareskog, L., Padyukov, L., Lorentzen, J. & Alfredsson, L. Mechanisms of  
622 disease: genetic susceptibility and environmental triggers in the development of  
623 rheumatoid arthritis. *NAT CLIN PRACT RHEUM* **2**, 425-433 (2006).
- 624 2. Sparks, J.A. *et al.* Associations of Smoking and Age With Inflammatory Joint  
625 Signs Among Unaffected First-Degree Relatives of Rheumatoid Arthritis  
626 Patients: Results From Studies of the Etiology of Rheumatoid Arthritis. *Arthritis*  
627 *Rheum* **68**, 1828-1838 (2016).
- 628 3. Traylor, M. *et al.* Genetic and environmental risk factors for rheumatoid arthritis  
629 in a UK African ancestry population: the GENRA case-control study. *Arthritis*  
630 *Rheum*, kex048 (2017).
- 631 4. van Gaalen, F.A. *et al.* Association between HLA class II genes and  
632 autoantibodies to cyclic citrullinated peptides (CCPs) influences the severity of  
633 rheumatoid arthritis. *Arthritis Rheum* **50**, 2113-2121 (2004).
- 634 5. Huizinga, T.W. *et al.* Refining the complex rheumatoid arthritis phenotype based  
635 on specificity of the HLA-DRB1 shared epitope for antibodies to citrullinated  
636 proteins. *Arthritis Rheum* **52**, 3433-3438 (2005).
- 637 6. Klareskog, L. *et al.* A new model for an etiology of rheumatoid arthritis:  
638 smoking may trigger HLA-DR (shared epitope)-restricted immune reactions to  
639 autoantigens modified by citrullination. *Arthritis Rheum* **54**, 38-46 (2006).



- 640 7. Chun-Lai, T. *et al.* Shared epitope alleles remain a risk factor for  
641 anti-citrullinated proteins antibody (ACPA)–positive rheumatoid arthritis in three  
642 Asian ethnic groups. *PloS one* **6**, e21069 (2011).
- 643 8. Liu, X. *et al.* HLA-DRB1 shared epitope-dependent DR-DQ haplotypes are  
644 associated with both anti-CCP-positive and -negative rheumatoid arthritis in  
645 Chinese Han. *PLoS One* **8**, e71373 (2013).
- 646 9. Raychaudhuri, S. *et al.* Five amino acids in three HLA proteins explain most of  
647 the association between MHC and seropositive rheumatoid arthritis. *Nat Genet*  
648 **44**, 291-296 (2012).
- 649 10. Okada, Y. *et al.* Risk for ACPA-positive rheumatoid arthritis is driven by shared  
650 HLA amino acid polymorphisms in Asian and European populations. *HUM*  
651 *MOL GENET* **23**, 6916-6926 (2014).
- 652 11. Lee, H.S. *et al.* Increased susceptibility to rheumatoid arthritis in Koreans  
653 heterozygous for HLA-DRB1\*0405 and \*0901. *Arthritis Rheum* **50**, 3468-3475  
654 (2004).
- 655 12. Furuya, T. *et al.* Differential association of HLA-DRB1 alleles in Japanese  
656 patients with early rheumatoid arthritis in relationship to autoantibodies to cyclic  
657 citrullinated peptide. *CLIN EXP RHEUMATOL* **25**, 219 (2007).
- 658 13. Lee, H.S. *et al.* Genetic risk factors for rheumatoid arthritis differ in Caucasian  
659 and Korean populations. *Arthritis Rheum* **60**, 364-371 (2009).

- 660 14. Terao, C. *et al.* Brief Report: Main Contribution of DRB1\*04:05 Among the  
661 Shared Epitope Alleles and Involvement of DRB1 Amino Acid Position 57 in  
662 Association With Joint Destruction in Anti-Citrullinated Protein  
663 Antibody-Positive Rheumatoid Arthritis. *Arthritis Rheumatol* **67**, 1744-1750  
664 (2015).
- 665 15. Han, B. *et al.* Fine mapping seronegative and seropositive rheumatoid arthritis to  
666 shared and distinct HLA alleles by adjusting for the effects of heterogeneity. *Am*  
667 *J Hum Genet* **94**, 522-532 (2014).
- 668 16. Chen, P.L. *et al.* Genetic determinants of antithyroid drug-induced  
669 agranulocytosis by human leukocyte antigen genotyping and genome-wide  
670 association study. *Nat Commun* **6**(2015).
- 671 17. de Bakker, P.I.W. & Raychaudhuri, S. Interrogating the major histocompatibility  
672 complex with high-throughput genomics. *Hum Mol Genet* **21**, R29-R36 (2012).
- 673 18. Saag, K.G. *et al.* Cigarette smoking and rheumatoid arthritis severity. *Ann*  
674 *Rheum Dis* **56**, 463-469 (1997).
- 675 19. Hutchinson, D. & Moots, R. Cigarette smoking and severity of rheumatoid  
676 arthritis. *Rheumatology (Oxford)* **40**, 1426-1427 (2001).
- 677 20. Padyukov, L., Silva, C., Stolt, P., Alfredsson, L. & Klareskog, L. A  
678 gene-environment interaction between smoking and shared epitope genes in  
679 HLA-DR provides a high risk of seropositive rheumatoid arthritis. *Arthritis*  
680 *Rheum* **50**, 3085-3092 (2004).

- 681 21. Linn-Rasker, S.P. *et al.* Smoking is a risk factor for anti-CCP antibodies only in  
682 rheumatoid arthritis patients who carry HLA-DRB1 shared epitope alleles. *Ann*  
683 *Rheum Dis* **65**, 366-371 (2006).
- 684 22. Källberg, H. *et al.* Gene-gene and gene-environment interactions involving  
685 HLA-DRB1, PTPN22, and smoking in two subsets of rheumatoid arthritis. *Am J*  
686 *Hum Genet* **80**, 867-875 (2007).
- 687 23. Mahdi, H. *et al.* Specific interaction between genotype, smoking and  
688 autoimmunity to citrullinated alpha-enolase in the etiology of rheumatoid  
689 arthritis. *Nat Genet* **41**, 1319-1324 (2009).
- 690 24. Kallberg, H. *et al.* Smoking is a major preventable risk factor for rheumatoid  
691 arthritis: estimations of risks after various exposures to cigarette smoke. *Ann*  
692 *Rheum Dis* **70**, 508-511 (2011).
- 693 25. Too, C.L. *et al.* Smoking interacts with HLA-DRB1 shared epitope in the  
694 development of anti-citrullinated protein antibody-positive rheumatoid arthritis:  
695 results from the Malaysian Epidemiological Investigation of Rheumatoid  
696 Arthritis (MyEIRA). *Arthritis Res Ther* **14**, R89 (2012).
- 697 26. Hensvold, A.H. *et al.* Environmental and genetic factors in the development of  
698 anticitrullinated protein antibodies (ACPAs) and ACPA-positive rheumatoid  
699 arthritis: an epidemiological investigation in twins. *Ann Rheum Dis* **74**, 375-380  
700 (2015).

- 701 27. Arnett, F.C. *et al.* The American Rheumatism Association 1987 revised criteria  
702 for the classification of rheumatoid arthritis. *Arthritis Rheum* **31**, 315-324 (1988).
- 703 28. van der Heijde, D. How to read radiographs according to the Sharp/van der  
704 Heijde method. *J Rheumatol* **26**, 743-745 (1999).
- 705 29. Du, Y. *et al.* Contribution of functional LILRA3, but not nonfunctional LILRA3,  
706 to sex bias in susceptibility and severity of anti-citrullinated protein  
707 antibody-positive rheumatoid arthritis. *Arthritis Rheumatol* **66**, 822-30 (2014).
- 708 30. Zhou, F. *et al.* Deep sequencing of the MHC region in the Chinese population  
709 contributes to studies of complex disease. *Nat Genet* **48**, 740-746 (2016).
- 710 31. Cao, H. *et al.* An integrated tool to study MHC region: accurate SNV detection  
711 and HLA genes typing in human MHC region using targeted high-throughput  
712 sequencing. *PLoS One* **8**, e69388 (2013).
- 713 32. Mills, R.E. *et al.* An initial map of insertion and deletion (INDEL) variation in  
714 the human genome. *Genome Res* **16**, 1182-1190 (2006).
- 715 33. Cao, H. *et al.* A short-read multiplex sequencing method for reliable,  
716 cost-effective and high-throughput genotyping in large-scale studies. *Hum Mutat*  
717 **34**, 1715-1720 (2013).
- 718 34. Bettinotti, M.P., Mitsuishi, Y., Bibee, K., Lau, M. & Terasaki, P.I.  
719 Comprehensive method for the typing of HLA-A, B, and C alleles by direct  
720 sequencing of PCR products obtained from genomic DNA. *J Immunother* **20**,  
721 425-430 (1997).

- 722 35. Cordovado, S.K., Hancock, L.N., Simone, A.E., Hendrix, M. & Mueller, P.W.  
723 High-resolution genotyping of HLA-DQA1 in the GoKinD study and  
724 identification of novel alleles HLA-DQA1\*040102, HLA-DQA1\*0402 and  
725 HLA-DQA1\*0404. *Tissue Antigens* **65**, 448-458 (2005).
- 726 36. Patsopoulos, N.A. *et al.* Fine-Mapping the Genetic Association of the Major  
727 Histocompatibility Complex in Multiple Sclerosis: HLA and Non-HLA Effects.  
728 *PLoS Genet* **9**(2013).
- 729 37. Payami, H. *et al.* Relative predispositional effects (RPEs) of marker alleles with  
730 disease: HLA-DR alleles and Graves disease. *Am J Hum Genet* **45**, 541-546  
731 (1989).
- 732 38. Sud, A. & Thomsen, H. Genome-wide association study of classical Hodgkin  
733 lymphoma identifies key regulators of disease susceptibility. *Nat Commun* **8**,  
734 1892-1903 (2017).
- 735 39. Eswar, N. *et al.* Comparative protein structure modeling using Modeller. *Curr*  
736 *Protoc Bioinformatics* **Chapter 5**, Unit-5 6 (2006).
- 737 40. Brown, J.H. *et al.* Three-dimensional structure of the human class II  
738 histocompatibility antigen HLA-DR1. *Nature* **364**, 33-39 (1993).
- 739 41. Ghosh, P., Amaya, M., Mellins, E. & Wiley, D.C. The structure of an  
740 intermediate in class II MHC maturation: CLIP bound to HLA-DR3. *Nature* **378**,  
741 457-62 (1995).

- 742 42. Maier, J.A. *et al.* ff14SB: Improving the Accuracy of Protein Side Chain and  
743 Backbone Parameters from ff99SB. *J Chem Theory Comput* **11**, 3696-713  
744 (2015).
- 745 43. Petersen, H.G. Accuracy and efficiency of the particle mesh Ewald method. *J*  
746 *CHEM PHYS* **103**, 3668-3679 (1995).
- 747 44. Cherry, R.J. *et al.* Detection of dimers of dimers of human leukocyte antigen  
748 (HLA)-DR on the surface of living cells by single-particle fluorescence imaging.  
749 *J Cell Biol* **140**, 71-9 (1998).
- 750 45. Schafer, P.H. & Pierce, S.K. Evidence for dimers of MHC class II molecules in  
751 B lymphocytes and their role in low affinity T cell responses. *Immunity* **1**,  
752 699-707 (1994).
- 753 46. Schafer, P.H., Pierce, S.K. & Jardetzky, T.S. The structure of MHC class II: a  
754 role for dimer of dimers. *Semin Immunol* **7**, 389-98 (1995).
- 755 47. Nydam, T. *et al.* Mutations in MHC class II dimer of dimers contact residues:  
756 effects on antigen presentation. *Int Immunol* **10**, 1237-49 (1998).
- 757 48. Viatte, S., Plant, D. & Raychaudhuri, S. Genetics and epigenetics of rheumatoid  
758 arthritis. *Nat Rev Rheumatol* **9**, 141-53 (2013).
- 759 49. Scally, S.W. *et al.* A molecular basis for the association of the HLA-DRB1 locus,  
760 citrullination, and rheumatoid arthritis. *J Exp Med* **210**, 2569-82 (2013).

- 761 50. Okada, Y. *et al.* HLA-DRB1\*0901 lowers anti-cyclic citrullinated peptide  
762 antibody levels in Japanese patients with rheumatoid arthritis. *Ann Rheum Dis* **69**,  
763 1569-70 (2010).
- 764 51. Furuya, T. *et al.* Differential association of HLA-DRB1 alleles in Japanese  
765 patients with early rheumatoid arthritis in relationship to autoantibodies to cyclic  
766 citrullinated peptide. *Clin Exp Rheumatol* **25**, 219-24 (2007).
- 767 52. Orozco, G., Rueda, B. & Martin, J. Genetic basis of rheumatoid arthritis. *Biomed*  
768 *Pharmacother* **60**, 656-662 (2006).
- 769 53. Holoshitz, J. The rheumatoid arthritis HLA-DRB1 shared epitope. *Curr Opin*  
770 *Rheumatol* **22**, 293 (2010).
- 771 54. Okada, Y. *et al.* Meta-analysis identifies nine new loci associated with  
772 rheumatoid arthritis in the Japanese population. *Nat Genet* **44**, 511-516 (2012).
- 773 55. Lemin, A.J. & Darke, C. Prevalence of HLA-DQA1 alleles and haplotypes in  
774 blood donors resident in Wales. *Int J Immunogenet* **41**, 480-483 (2014).
- 775 56. Zajacova, M., Kotrbova-Kozak, A. & Cerna, M. HLA-DRB1, -DQA1 and  
776 -DQB1 genotyping of 180 Czech individuals from the Czech Republic pop 3.  
777 *Hum Immunol* **77**, 365-366 (2016).
- 778 57. Okada, Y. *et al.* Contribution of a non-classical HLA gene, HLA-DOA, to the  
779 risk of rheumatoid arthritis. *AM J HUM GENET* **99**, 366-374 (2016).
- 780 58. Yang, S. *et al.* Association of HLA-DQA1 and DQB1 genes with vitiligo in  
781 Chinese Hans. *Int J Dermatol* **44**, 1022-1027 (2005).

- 782 59. Zhu, W.-H. *et al.* HLA-DQA1\* 03: 02/DQB1\* 03: 03: 02 is strongly associated  
783 with susceptibility to childhood-onset ocular myasthenia gravis in Southern Han  
784 Chinese. *J Neuroimmunol* **247**, 81-85 (2012).
- 785 60. Ohtsu, S. *et al.* Slowly progressing form of type 1 diabetes mellitus in children:  
786 genetic analysis compared with other forms of diabetes mellitus in Japanese  
787 children. *PEDIATR DIABETES* **6**, 221-229 (2005).
- 788 61. Lindstedt, R., Monk, N., Lombardi, G. & Lechler, R. Amino acid substitutions in  
789 the putative MHC class II "dimer of dimers" interface inhibit CD4+ T cell  
790 activation. *J Immunol* **166**, 800-8 (2001).
- 791 62. Chen, Y.-Z., Matsushita, S. & Nishimura, Y. A single residue polymorphism at  
792 DR $\beta$  37 affects recognition of peptides by T cells. *HUM IMMUNOL* **54**, 30-39  
793 (1997).
- 794 63. Kaneko, T. & Obata, F. Allogeneic Recognition of HLA-DRB1\* 0406 by T  
795 Cells with HLA-DRB 1\* 0403: Role of Amino Acid Residue 37 on the  $\beta$  Sheet  
796 in T Cell Recognition. *Immunobiology* **195**, 261-270 (1996).
- 797 64. Huang, R. *et al.* The amino acid variation within the binding pocket 7 and 9 of  
798 HLA-DRB1 molecules are associated with primary Sjogren's syndrome. *J*  
799 *Autoimmun* **57**, 53-59 (2015).
- 800 65. Hov, J.R. *et al.* Electrostatic modifications of the human leukocyte antigen-DR  
801 P9 peptide-binding pocket and susceptibility to primary sclerosing cholangitis.  
802 *Hepatology* **53**, 1967-1976 (2011).



803
